# Supplementary material for: Enhancement of magnetic properties by spark plasma sintering of hydrothermally synthesised SrFe12O19
Source: Royal Society of Chemistry journal article supplement (doi:10.1039/c6ce02275h), 2017-01-01
Supplement: c6ce02275h1.pdf [file c6ce02275h1.pdf]

## Supporting Information

Detailed results of the Rietveld refinements for the three powder samples: The initial powder, the powder ball milled for 10 minutes, and the powder ball milled for 20 minutes.

Table 1: Results of the Rietveld refinements from the obtained PXRD patterns.

|                                                                 | Initial SrFe <sub>12</sub> O <sub>19</sub> | SrFe <sub>12</sub> O <sub>19</sub> ball milled<br>10 min | SrFe <sub>12</sub> O <sub>19</sub> ball milled<br>20 min |
|-----------------------------------------------------------------|--------------------------------------------|----------------------------------------------------------|----------------------------------------------------------|
| SrFe <sub>12</sub> O <sub>19</sub> (wt%)                        | 96(1)                                      | 96(1)                                                    | 95(5)                                                    |
| α-Fe <sub>2</sub> O <sub>3</sub> (wt%)                          | 4.(1)                                      | 4(1)                                                     | 5(1)                                                     |
| R <sub>F</sub> (SrFe <sub>12</sub> O <sub>19</sub> )            | 6.87                                       | 5.51                                                     | 9.02                                                     |
| R <sub>wp</sub> (SrFe <sub>12</sub> O <sub>19</sub> )           | 18.3                                       | 19.8                                                     | 7.94                                                     |
| SrFe <sub>12</sub> O <sub>19</sub> crystallite c-<br>size (nm)  | 46.5(4)                                    | 40 (6)                                                   | 53.4(7)                                                  |
| SrFe <sub>12</sub> O <sub>19</sub> crystallite ab-<br>size (nm) | 168(2)                                     | 148(4)                                                   | 141(2)                                                   |
| SrFe <sub>12</sub> O <sub>19</sub> unit cell c-axis<br>(Å)      | 23.0795(1)                                 | 23.0769(3)                                               | 23.0802(1)                                               |
| SrFe <sub>12</sub> O <sub>19</sub> unit cell ab-<br>axis (Å)    | 5.882889(2)                                | 5.88249(5)                                               | 5.88291(2)                                               |
| R <sub>F</sub> α-Fe <sub>2</sub> O <sub>3</sub>                 | 8.04                                       | 28.8                                                     | 13.6                                                     |
| α-Fe <sub>2</sub> O <sub>3</sub> unit cell c-axis<br>(Å)        | 13.7543(3)                                 | 13.7519(8)                                               | 13.7548(4)                                               |
| α-Fe <sub>2</sub> O <sub>3</sub> unit cell ab-axis<br>(Å)       | 5.03613(6)                                 | 5.0365(2)                                                | 5.0363(1)                                                |

TEM measurements were made on the initial and ball milled powder. The images are seen in figure 1.

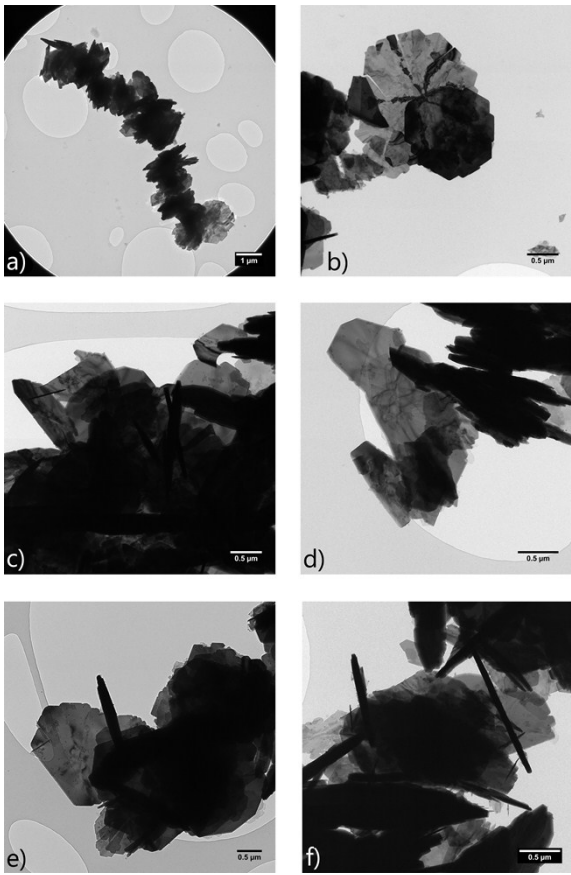

Figure 1: TEM measurements of SrFe<sub>12</sub>O<sub>19</sub>. a) and b): Initial powder, c) and d) powder ball milled for 10 minutes, e) and f) powder ball milled for 20 minutes.

## Pole figure measurements

The obtained pole figure measurements can be seen on Figure 2, 3, and 4 showing pRT, p950, and p950\_Ha.

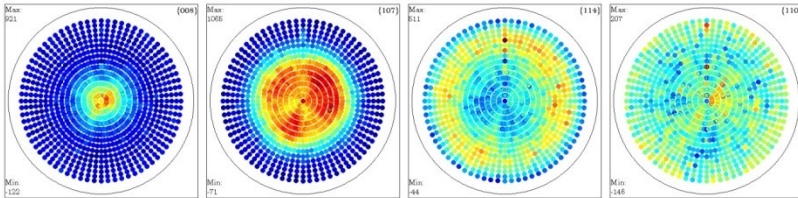

Figure 2: Pole figure measurement of pellet pRT.

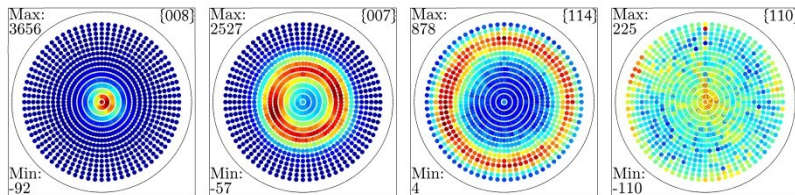

Figure 3: Pole figure measurement of p950.

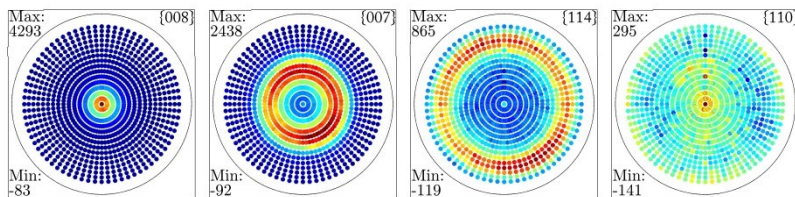

Figure 4: Pole figure measurement of p950\_Ha.
